# Supplementary material for: A temperature-responsive selenium nanohydrogel for strawberry grey mould management
Source: Royal Society of Chemistry journal article supplement (doi:10.1039/d2tb00345g), 2022-01-01
Supplement: d2tb00345g1.pdf [file d2tb00345g1.pdf]

### Supporting Information

#### Temperature-Responsive Selenium Nanohydrogel for Strawberry Grey Mould Management

Yanan Liu<sup>a\*,1</sup>, Yuqin Huang<sup>b,1</sup>, Jiawei Liu<sup>b</sup>, Jie Liu<sup>b\*</sup>

<sup>a</sup>.Shenzhen Longhua Maternity and Child Healthcare Hospital, Shenzhen, 518110, China.

<sup>b</sup>.Department of Chemistry, College of Chemistry and Materials Science, Jinan University, Guangzhou 511436, China.

\*Corresponding author, Jie Liu, E-mail:tliuliu@jnu.edu.cn; Yanan Liu, E-mail:yananliu0321@163.com

<sup>1</sup>These authors contributed equally to the work.

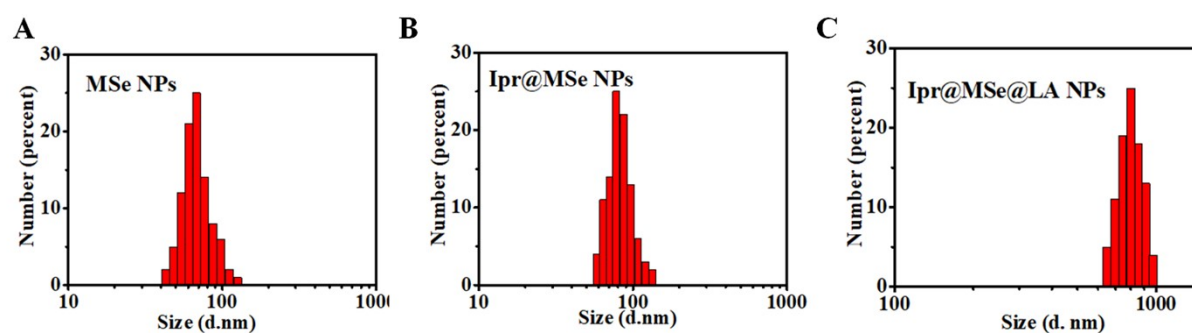

**Fig. S1.** Hydrodynamic diameters and distributions of (A) MSe NPs, (B) Ipr@MSe NPs and (C) Ipr@MSe@LA NPs.

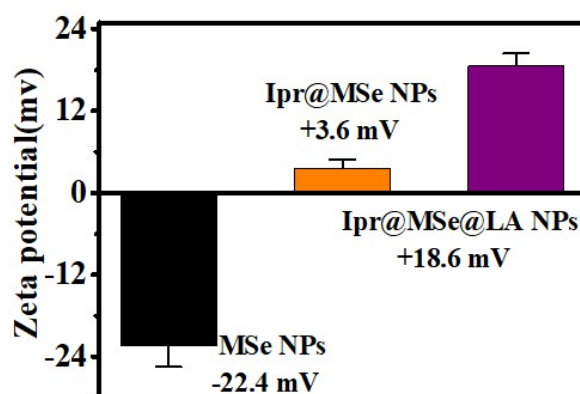

**Fig. S2.** Variation of zeta potentials of Se NPs, Ipr@Se NPs and Ipr@Se@LA NPs during the synthetic process.

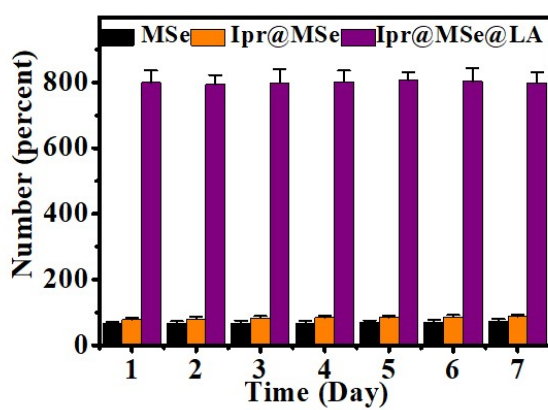

**Fig. S3.** The size of nanoparticles at each stage at different time (1-7 days).

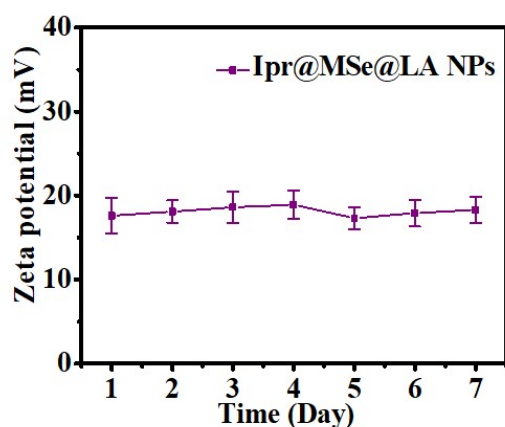

**Fig. S4.** The relative zeta potential change of TM@Se@PAA NPs at different time (1-7 days).

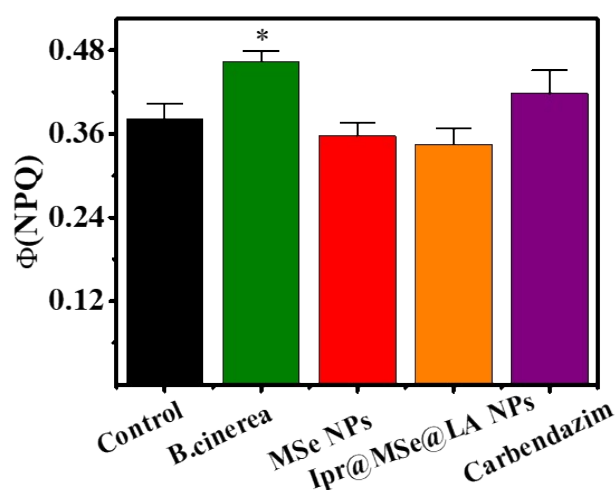

**Fig. S5.** Quantum yield of regulatory energy dissipation ( $\Phi$ NPQ) of PSII in strawberry plants treated with different samples: no processing (control), inoculating *B.cinerea*, MSe NPs, Ipr@MSe@LA NPs and carbendazim. (Statistical differences between groups of *B. cinerea*, MSe NPs, Ipr@MSe@LA NPs and carbendazim vs control group were compared by \*  $P < 0.05$ , \*\*  $P < 0.01$ , respectively). Each bar represents the mean SD (n=5).

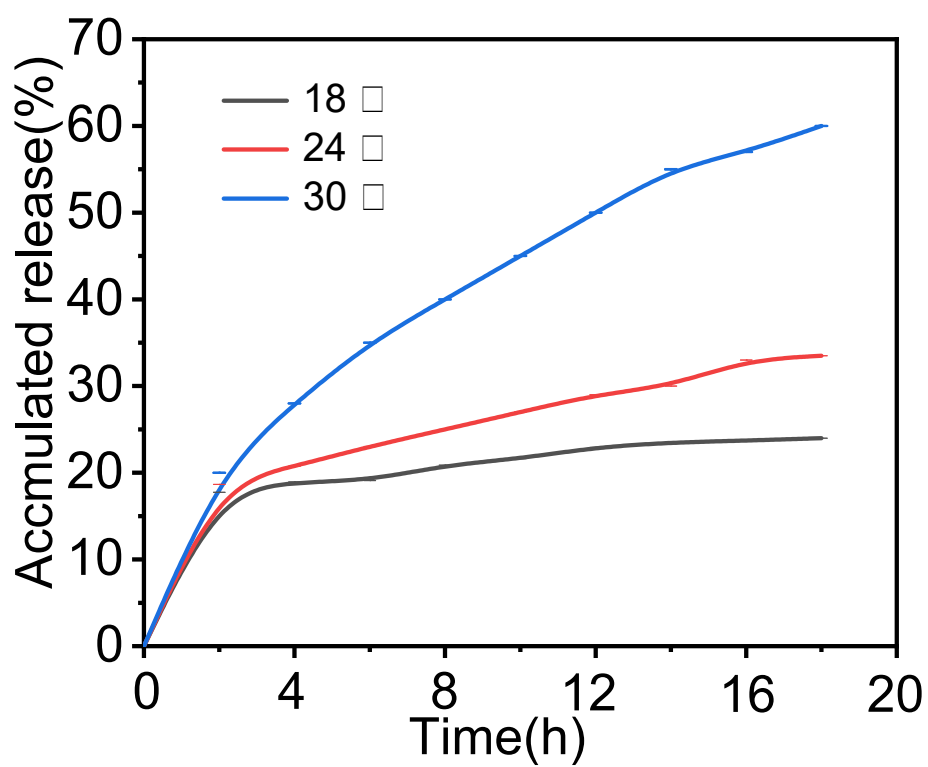

**Fig. S6.** The release behavior of Ipr@MSe@LA NPs at 18、24、30 °C.
